# Supplementary material
Source: publisher figshare collection journal article supplement (https://tandf.figshare.com/ndownloader/files/22219926)
Supplement: Supplementary file 1 [file 22219926]

## Increased yearling weight as a proportion of 21-month weight was associated with increased milk production in dairy heifers

RC Handcock<sup>a§</sup>, N Lopez-Villalobos<sup>a</sup>, LR McNaughton<sup>b</sup>, PJ Back<sup>a</sup>, GR Edwards<sup>c</sup> and RE Hickson<sup>1a</sup>

<sup>a</sup> School of Agriculture and Environment, Massey University, Private Bag 11-222, Palmerston North, New Zealand

<sup>b</sup> LIC, Private Bag 3016, Hamilton 3240, New Zealand

<sup>c</sup> Faculty of Agriculture and Life Sciences, PO Box 85084, Lincoln University, Lincoln 7647, Christchurch, New Zealand

§Author for correspondence. Email: [R.C.Handcock@massey.ac.nz](mailto:R.C.Handcock@massey.ac.nz)

**Supplementary Table 1. Number (n) of Holstein-Friesian (F), Holstein-Friesian crossbred (FX), Holstein-Friesian-Jersey crossbred (FJ), Jersey crossbred (JX) and Jersey (J) heifers that contributed their first lactation only, first and second lactations only or first, second and third lactations to their accumulated three-year-yield. For further explanation of the dataset refer to Figure 1 in the manuscript.**

| Breed group and LWT category | 1st, 2nd and 3rd lactations | 1st and 2nd lactations only | 1st lactation only | Total        |
|------------------------------|-----------------------------|-----------------------------|--------------------|--------------|
| <b>F</b>                     |                             |                             |                    |              |
| Tiny                         | 1,808                       | 762                         | 516                | <b>3,086</b> |
| Small                        | 2,105                       | 722                         | 489                | <b>3,316</b> |
| Average                      | 2,132                       | 628                         | 550                | <b>3,310</b> |
| Big                          | 2,117                       | 658                         | 535                | <b>3,310</b> |
| Huge                         | 2,108                       | 676                         | 576                | <b>3,360</b> |
| <b>FX</b>                    |                             |                             |                    |              |
| Tiny                         | 2,675                       | 980                         | 616                | <b>4,271</b> |
| Small                        | 2,888                       | 793                         | 671                | <b>4,352</b> |
| Average                      | 3,072                       | 828                         | 677                | <b>4,577</b> |
| Big                          | 3,059                       | 776                         | 656                | <b>4,491</b> |
| Huge                         | 3,060                       | 707                         | 734                | <b>4,501</b> |
| <b>FJ</b>                    |                             |                             |                    |              |
| Tiny                         | 1,949                       | 639                         | 405                | <b>2,993</b> |
| Small                        | 1,933                       | 539                         | 398                | <b>2,870</b> |
| Average                      | 2,104                       | 542                         | 385                | <b>3,031</b> |
| Big                          | 2,196                       | 517                         | 459                | <b>3,172</b> |
| Huge                         | 2,125                       | 506                         | 457                | <b>3,088</b> |
| <b>JX</b>                    |                             |                             |                    |              |
| Tiny                         | 1,179                       | 342                         | 271                | <b>1,792</b> |
| Small                        | 1,154                       | 311                         | 242                | <b>1,707</b> |
| Average                      | 1,193                       | 255                         | 248                | <b>1,696</b> |
| Big                          | 1,176                       | 332                         | 236                | <b>1,744</b> |
| Huge                         | 1,147                       | 326                         | 260                | <b>1,733</b> |
| <b>J</b>                     |                             |                             |                    |              |
| Tiny                         | 790                         | 262                         | 178                | <b>1,230</b> |

## Supplementary Information

*Handcock et al.*

*New Zealand Veterinary Journal*

S2

|              |               |               |               |               |
|--------------|---------------|---------------|---------------|---------------|
| Small        | 762           | 200           | 175           | <b>1,137</b>  |
| Average      | 809           | 207           | 135           | <b>1,151</b>  |
| Big          | 716           | 161           | 151           | <b>1,028</b>  |
| Huge         | 594           | 167           | 126           | <b>887</b>    |
| <b>Total</b> | <b>44,851</b> | <b>12,836</b> | <b>10,146</b> | <b>67,833</b> |

Heifers were categorised into quintiles as tiny, small, average, big or huge at 21 months of age within each breed group

.

**Supplementary Table 2. Predicted absolute growth rate (AGR;  $\pm$ SEM) from three to 21 months of age for Holstein-Friesian (F) heifers that were tiny, small, average, big or huge at 21 months of age and were 45%, 55% or 65% of their 21-month live weight (LWT) at 12 months of age (LWT(12/21)%).**

|         | 3-6 mo                        | 6-9 mo                        | 9-12 mo                       | 12-15 mo                      | 15-18 mo                      | 18-21 mo                      |
|---------|-------------------------------|-------------------------------|-------------------------------|-------------------------------|-------------------------------|-------------------------------|
| Tiny    |                               |                               |                               |                               |                               |                               |
| 45%     | 0.47 <sup>a</sup> $\pm$ 0.003 | 0.22 <sup>a</sup> $\pm$ 0.002 | 0.40 <sup>a</sup> $\pm$ 0.002 | 0.73 <sup>c</sup> $\pm$ 0.002 | 0.94 <sup>c</sup> $\pm$ 0.001 | 0.73 <sup>c</sup> $\pm$ 0.003 |
| 55%     | 0.58 <sup>b</sup> $\pm$ 0.002 | 0.39 <sup>b</sup> $\pm$ 0.001 | 0.49 <sup>b</sup> $\pm$ 0.002 | 0.67 <sup>b</sup> $\pm$ 0.002 | 0.75 <sup>b</sup> $\pm$ 0.001 | 0.53 <sup>b</sup> $\pm$ 0.002 |
| 65%     | 0.68 <sup>c</sup> $\pm$ 0.002 | 0.56 <sup>c</sup> $\pm$ 0.002 | 0.57 <sup>c</sup> $\pm$ 0.002 | 0.61 <sup>a</sup> $\pm$ 0.002 | 0.57 <sup>a</sup> $\pm$ 0.001 | 0.33 <sup>a</sup> $\pm$ 0.002 |
| Small   |                               |                               |                               |                               |                               |                               |
| 45%     | 0.51 <sup>a</sup> $\pm$ 0.003 | 0.22 <sup>a</sup> $\pm$ 0.002 | 0.43 <sup>a</sup> $\pm$ 0.002 | 0.81 <sup>c</sup> $\pm$ 0.002 | 1.02 <sup>c</sup> $\pm$ 0.001 | 0.75 <sup>c</sup> $\pm$ 0.003 |
| 55%     | 0.63 <sup>b</sup> $\pm$ 0.002 | 0.41 <sup>b</sup> $\pm$ 0.001 | 0.53 <sup>b</sup> $\pm$ 0.002 | 0.75 <sup>b</sup> $\pm$ 0.002 | 0.83 <sup>b</sup> $\pm$ 0.001 | 0.53 <sup>b</sup> $\pm$ 0.002 |
| 65%     | 0.75 <sup>c</sup> $\pm$ 0.003 | 0.60 <sup>c</sup> $\pm$ 0.002 | 0.63 <sup>c</sup> $\pm$ 0.002 | 0.69 <sup>a</sup> $\pm$ 0.002 | 0.63 <sup>a</sup> $\pm$ 0.001 | 0.30 <sup>a</sup> $\pm$ 0.002 |
| Average |                               |                               |                               |                               |                               |                               |
| 45%     | 0.53 <sup>a</sup> $\pm$ 0.003 | 0.22 <sup>a</sup> $\pm$ 0.002 | 0.45 <sup>a</sup> $\pm$ 0.002 | 0.86 <sup>c</sup> $\pm$ 0.002 | 1.08 <sup>c</sup> $\pm$ 0.001 | 0.75 <sup>c</sup> $\pm$ 0.003 |
| 55%     | 0.66 <sup>b</sup> $\pm$ 0.002 | 0.42 <sup>b</sup> $\pm$ 0.001 | 0.55 <sup>b</sup> $\pm$ 0.002 | 0.79 <sup>b</sup> $\pm$ 0.002 | 0.87 <sup>b</sup> $\pm$ 0.001 | 0.52 <sup>b</sup> $\pm$ 0.002 |
| 65%     | 0.79 <sup>c</sup> $\pm$ 0.003 | 0.61 <sup>c</sup> $\pm$ 0.002 | 0.65 <sup>c</sup> $\pm$ 0.002 | 0.73 <sup>a</sup> $\pm$ 0.002 | 0.67 <sup>a</sup> $\pm$ 0.001 | 0.29 <sup>a</sup> $\pm$ 0.003 |
| Big     |                               |                               |                               |                               |                               |                               |
| 45%     | 0.56 <sup>a</sup> $\pm$ 0.003 | 0.22 <sup>a</sup> $\pm$ 0.002 | 0.47 <sup>a</sup> $\pm$ 0.002 | 0.91 <sup>c</sup> $\pm$ 0.002 | 1.13 <sup>c</sup> $\pm$ 0.001 | 0.75 <sup>c</sup> $\pm$ 0.003 |
| 55%     | 0.69 <sup>b</sup> $\pm$ 0.002 | 0.43 <sup>b</sup> $\pm$ 0.001 | 0.58 <sup>b</sup> $\pm$ 0.002 | 0.84 <sup>b</sup> $\pm$ 0.002 | 0.92 <sup>b</sup> $\pm$ 0.001 | 0.51 <sup>b</sup> $\pm$ 0.002 |
| 65%     | 0.83 <sup>c</sup> $\pm$ 0.003 | 0.63 <sup>c</sup> $\pm$ 0.002 | 0.68 <sup>c</sup> $\pm$ 0.002 | 0.77 <sup>a</sup> $\pm$ 0.002 | 0.71 <sup>a</sup> $\pm$ 0.001 | 0.28 <sup>a</sup> $\pm$ 0.003 |
| Huge    |                               |                               |                               |                               |                               |                               |
| 45%     | 0.61 <sup>a</sup> $\pm$ 0.003 | 0.24 <sup>a</sup> $\pm$ 0.002 | 0.51 <sup>a</sup> $\pm$ 0.003 | 0.98 <sup>c</sup> $\pm$ 0.002 | 1.22 <sup>c</sup> $\pm$ 0.001 | 0.80 <sup>c</sup> $\pm$ 0.003 |
| 55%     | 0.75 <sup>b</sup> $\pm$ 0.002 | 0.46 <sup>b</sup> $\pm$ 0.002 | 0.62 <sup>b</sup> $\pm$ 0.002 | 0.90 <sup>b</sup> $\pm$ 0.002 | 0.99 <sup>b</sup> $\pm$ 0.001 | 0.54 <sup>b</sup> $\pm$ 0.002 |
| 65%     | 0.89 <sup>c</sup> $\pm$ 0.003 | 0.67 <sup>c</sup> $\pm$ 0.002 | 0.73 <sup>c</sup> $\pm$ 0.002 | 0.83 <sup>a</sup> $\pm$ 0.002 | 0.76 <sup>a</sup> $\pm$ 0.001 | 0.27 <sup>a</sup> $\pm$ 0.003 |

<sup>a-c</sup> Values within a column and LWT category with different superscripts differ at the 95% confidence interval.

Heifers were categorised into quintiles as tiny, small, average, big or huge at 21 months of age within each breed group

**Supplementary Table 3. Predicted absolute growth rate (AGR;  $\pm$ SEM) from 3 to 21 months of age for Holstein-Friesian crossbred (FX) heifers that were tiny, small, average, big or huge at 21 months of age and were 45%, 55% or 65% of their 21-month live weight (LWT) at 12 months of age (LWT(12/21)%).**

|         | 3-6 mo                        | 6-9 mo                        | 9-12 mo                       | 12-15 mo                      | 15-18 mo                      | 18-21 mo                      |
|---------|-------------------------------|-------------------------------|-------------------------------|-------------------------------|-------------------------------|-------------------------------|
| Tiny    |                               |                               |                               |                               |                               |                               |
| 45%     | 0.45 <sup>a</sup> $\pm$ 0.003 | 0.22 <sup>a</sup> $\pm$ 0.002 | 0.39 <sup>a</sup> $\pm$ 0.002 | 0.70 <sup>c</sup> $\pm$ 0.002 | 0.90 <sup>c</sup> $\pm$ 0.001 | 0.74 <sup>c</sup> $\pm$ 0.003 |
| 55%     | 0.56 <sup>b</sup> $\pm$ 0.002 | 0.38 <sup>b</sup> $\pm$ 0.001 | 0.47 <sup>b</sup> $\pm$ 0.002 | 0.64 <sup>b</sup> $\pm$ 0.002 | 0.73 <sup>b</sup> $\pm$ 0.001 | 0.53 <sup>b</sup> $\pm$ 0.002 |
| 65%     | 0.67 <sup>c</sup> $\pm$ 0.002 | 0.55 <sup>c</sup> $\pm$ 0.002 | 0.55 <sup>c</sup> $\pm$ 0.002 | 0.59 <sup>a</sup> $\pm$ 0.002 | 0.55 <sup>a</sup> $\pm$ 0.001 | 0.33 <sup>a</sup> $\pm$ 0.002 |
| Small   |                               |                               |                               |                               |                               |                               |
| 45%     | 0.49 <sup>a</sup> $\pm$ 0.003 | 0.23 <sup>a</sup> $\pm$ 0.002 | 0.42 <sup>a</sup> $\pm$ 0.002 | 0.77 <sup>c</sup> $\pm$ 0.002 | 0.98 <sup>c</sup> $\pm$ 0.001 | 0.76 <sup>c</sup> $\pm$ 0.003 |
| 55%     | 0.62 <sup>b</sup> $\pm$ 0.002 | 0.40 <sup>b</sup> $\pm$ 0.001 | 0.51 <sup>b</sup> $\pm$ 0.002 | 0.71 <sup>b</sup> $\pm$ 0.002 | 0.79 <sup>b</sup> $\pm$ 0.001 | 0.54 <sup>b</sup> $\pm$ 0.002 |
| 65%     | 0.74 <sup>c</sup> $\pm$ 0.002 | 0.58 <sup>c</sup> $\pm$ 0.002 | 0.60 <sup>c</sup> $\pm$ 0.002 | 0.65 <sup>a</sup> $\pm$ 0.002 | 0.60 <sup>a</sup> $\pm$ 0.001 | 0.32 <sup>a</sup> $\pm$ 0.002 |
| Average |                               |                               |                               |                               |                               |                               |
| 45%     | 0.52 <sup>a</sup> $\pm$ 0.003 | 0.22 <sup>a</sup> $\pm$ 0.002 | 0.43 <sup>a</sup> $\pm$ 0.002 | 0.81 <sup>c</sup> $\pm$ 0.002 | 1.04 <sup>c</sup> $\pm$ 0.001 | 0.76 <sup>c</sup> $\pm$ 0.003 |
| 55%     | 0.65 <sup>b</sup> $\pm$ 0.002 | 0.41 <sup>b</sup> $\pm$ 0.001 | 0.53 <sup>b</sup> $\pm$ 0.002 | 0.75 <sup>b</sup> $\pm$ 0.002 | 0.84 <sup>b</sup> $\pm$ 0.001 | 0.53 <sup>b</sup> $\pm$ 0.002 |
| 65%     | 0.77 <sup>c</sup> $\pm$ 0.002 | 0.60 <sup>c</sup> $\pm$ 0.002 | 0.63 <sup>c</sup> $\pm$ 0.002 | 0.69 <sup>a</sup> $\pm$ 0.002 | 0.64 <sup>a</sup> $\pm$ 0.001 | 0.31 <sup>a</sup> $\pm$ 0.002 |
| Big     |                               |                               |                               |                               |                               |                               |
| 45%     | 0.55 <sup>a</sup> $\pm$ 0.003 | 0.22 <sup>a</sup> $\pm$ 0.002 | 0.45 <sup>a</sup> $\pm$ 0.002 | 0.87 <sup>c</sup> $\pm$ 0.002 | 1.09 <sup>c</sup> $\pm$ 0.001 | 0.75 <sup>c</sup> $\pm$ 0.003 |
| 55%     | 0.68 <sup>b</sup> $\pm$ 0.002 | 0.42 <sup>b</sup> $\pm$ 0.001 | 0.55 <sup>b</sup> $\pm$ 0.002 | 0.80 <sup>b</sup> $\pm$ 0.002 | 0.88 <sup>b</sup> $\pm$ 0.001 | 0.52 <sup>b</sup> $\pm$ 0.002 |
| 65%     | 0.81 <sup>c</sup> $\pm$ 0.003 | 0.62 <sup>c</sup> $\pm$ 0.002 | 0.65 <sup>c</sup> $\pm$ 0.002 | 0.73 <sup>a</sup> $\pm$ 0.002 | 0.67 <sup>a</sup> $\pm$ 0.001 | 0.30 <sup>a</sup> $\pm$ 0.002 |
| Huge    |                               |                               |                               |                               |                               |                               |
| 45%     | 0.60 <sup>a</sup> $\pm$ 0.003 | 0.24 <sup>a</sup> $\pm$ 0.002 | 0.49 <sup>a</sup> $\pm$ 0.002 | 0.94 <sup>c</sup> $\pm$ 0.002 | 1.17 <sup>c</sup> $\pm$ 0.001 | 0.78 <sup>c</sup> $\pm$ 0.003 |
| 55%     | 0.74 <sup>b</sup> $\pm$ 0.002 | 0.45 <sup>b</sup> $\pm$ 0.001 | 0.59 <sup>b</sup> $\pm$ 0.002 | 0.86 <sup>b</sup> $\pm$ 0.002 | 0.95 <sup>b</sup> $\pm$ 0.001 | 0.54 <sup>b</sup> $\pm$ 0.002 |
| 65%     | 0.87 <sup>c</sup> $\pm$ 0.003 | 0.65 <sup>c</sup> $\pm$ 0.002 | 0.70 <sup>c</sup> $\pm$ 0.002 | 0.79 <sup>a</sup> $\pm$ 0.002 | 0.72 <sup>a</sup> $\pm$ 0.001 | 0.30 <sup>a</sup> $\pm$ 0.003 |

<sup>a-c</sup> Values within a column and LWT category with different superscripts differ at the 95% confidence interval.

Heifers were categorised into quintiles as tiny, small, average, big or huge at 21 months of age within each breed group

**Supplementary Table 4. Predicted absolute growth rate (AGR;  $\pm$ SEM) from 3 to 21 months of age for Holstein-Friesian-Jersey crossbred (FJ) heifers that were tiny, small, average, big or huge at 21 months of age and were 45%, 55% or 65% of their 21-month live weight (LWT) at 12 months of age (LWT(12/21)%).**

|         | 3-6 mo                        | 6-9 mo                        | 9-12 mo                       | 12-15 mo                      | 15-18 mo                      | 18-21 mo                      |
|---------|-------------------------------|-------------------------------|-------------------------------|-------------------------------|-------------------------------|-------------------------------|
| Tiny    |                               |                               |                               |                               |                               |                               |
| 45%     | 0.44 <sup>a</sup> $\pm$ 0.003 | 0.22 <sup>a</sup> $\pm$ 0.002 | 0.38 <sup>a</sup> $\pm$ 0.002 | 0.67 <sup>c</sup> $\pm$ 0.002 | 0.87 <sup>c</sup> $\pm$ 0.001 | 0.74 <sup>c</sup> $\pm$ 0.003 |
| 55%     | 0.54 <sup>b</sup> $\pm$ 0.002 | 0.38 <sup>b</sup> $\pm$ 0.001 | 0.46 <sup>b</sup> $\pm$ 0.002 | 0.62 <sup>b</sup> $\pm$ 0.002 | 0.70 <sup>b</sup> $\pm$ 0.001 | 0.53 <sup>b</sup> $\pm$ 0.002 |
| 65%     | 0.65 <sup>c</sup> $\pm$ 0.002 | 0.53 <sup>c</sup> $\pm$ 0.002 | 0.54 <sup>c</sup> $\pm$ 0.002 | 0.56 <sup>a</sup> $\pm$ 0.002 | 0.53 <sup>a</sup> $\pm$ 0.001 | 0.33 <sup>a</sup> $\pm$ 0.002 |
| Small   |                               |                               |                               |                               |                               |                               |
| 45%     | 0.48 <sup>a</sup> $\pm$ 0.003 | 0.22 <sup>a</sup> $\pm$ 0.002 | 0.40 <sup>a</sup> $\pm$ 0.002 | 0.73 <sup>c</sup> $\pm$ 0.002 | 0.94 <sup>c</sup> $\pm$ 0.001 | 0.76 <sup>c</sup> $\pm$ 0.003 |
| 55%     | 0.60 <sup>b</sup> $\pm$ 0.002 | 0.40 <sup>b</sup> $\pm$ 0.001 | 0.49 <sup>b</sup> $\pm$ 0.002 | 0.68 <sup>b</sup> $\pm$ 0.002 | 0.76 <sup>b</sup> $\pm$ 0.001 | 0.54 <sup>b</sup> $\pm$ 0.002 |
| 65%     | 0.72 <sup>c</sup> $\pm$ 0.003 | 0.57 <sup>c</sup> $\pm$ 0.002 | 0.58 <sup>c</sup> $\pm$ 0.002 | 0.62 <sup>a</sup> $\pm$ 0.002 | 0.58 <sup>a</sup> $\pm$ 0.001 | 0.33 <sup>a</sup> $\pm$ 0.003 |
| Average |                               |                               |                               |                               |                               |                               |
| 45%     | 0.51 <sup>a</sup> $\pm$ 0.003 | 0.23 <sup>a</sup> $\pm$ 0.002 | 0.42 <sup>a</sup> $\pm$ 0.002 | 0.78 <sup>c</sup> $\pm$ 0.002 | 0.99 <sup>c</sup> $\pm$ 0.001 | 0.76 <sup>c</sup> $\pm$ 0.003 |
| 55%     | 0.63 <sup>b</sup> $\pm$ 0.002 | 0.41 <sup>b</sup> $\pm$ 0.001 | 0.51 <sup>b</sup> $\pm$ 0.002 | 0.72 <sup>b</sup> $\pm$ 0.002 | 0.80 <sup>b</sup> $\pm$ 0.001 | 0.54 <sup>b</sup> $\pm$ 0.002 |
| 65%     | 0.75 <sup>c</sup> $\pm$ 0.003 | 0.59 <sup>c</sup> $\pm$ 0.002 | 0.60 <sup>c</sup> $\pm$ 0.002 | 0.66 <sup>a</sup> $\pm$ 0.002 | 0.61 <sup>a</sup> $\pm$ 0.001 | 0.33 <sup>a</sup> $\pm$ 0.003 |
| Big     |                               |                               |                               |                               |                               |                               |
| 45%     | 0.53 <sup>a</sup> $\pm$ 0.003 | 0.23 <sup>a</sup> $\pm$ 0.002 | 0.44 <sup>a</sup> $\pm$ 0.002 | 0.82 <sup>c</sup> $\pm$ 0.002 | 1.05 <sup>c</sup> $\pm$ 0.001 | 0.76 <sup>c</sup> $\pm$ 0.003 |
| 55%     | 0.66 <sup>b</sup> $\pm$ 0.002 | 0.42 <sup>b</sup> $\pm$ 0.001 | 0.53 <sup>b</sup> $\pm$ 0.002 | 0.76 <sup>b</sup> $\pm$ 0.002 | 0.85 <sup>b</sup> $\pm$ 0.001 | 0.53 <sup>b</sup> $\pm$ 0.002 |
| 65%     | 0.78 <sup>c</sup> $\pm$ 0.003 | 0.61 <sup>c</sup> $\pm$ 0.002 | 0.63 <sup>c</sup> $\pm$ 0.002 | 0.70 <sup>a</sup> $\pm$ 0.002 | 0.64 <sup>a</sup> $\pm$ 0.001 | 0.31 <sup>a</sup> $\pm$ 0.003 |
| Huge    |                               |                               |                               |                               |                               |                               |
| 45%     | 0.58 <sup>a</sup> $\pm$ 0.003 | 0.23 <sup>a</sup> $\pm$ 0.002 | 0.47 <sup>a</sup> $\pm$ 0.002 | 0.90 <sup>c</sup> $\pm$ 0.002 | 1.13 <sup>c</sup> $\pm$ 0.001 | 0.78 <sup>c</sup> $\pm$ 0.003 |
| 55%     | 0.71 <sup>b</sup> $\pm$ 0.002 | 0.44 <sup>b</sup> $\pm$ 0.001 | 0.57 <sup>b</sup> $\pm$ 0.002 | 0.82 <sup>b</sup> $\pm$ 0.002 | 0.91 <sup>b</sup> $\pm$ 0.001 | 0.54 <sup>b</sup> $\pm$ 0.002 |
| 65%     | 0.84 <sup>c</sup> $\pm$ 0.003 | 0.64 <sup>c</sup> $\pm$ 0.002 | 0.67 <sup>c</sup> $\pm$ 0.002 | 0.75 <sup>a</sup> $\pm$ 0.002 | 0.69 <sup>a</sup> $\pm$ 0.001 | 0.31 <sup>a</sup> $\pm$ 0.003 |

<sup>a-c</sup> Values within a column and LWT category with different superscripts differ at the 95% confidence interval.

Heifers were categorised into quintiles as tiny, small, average, big or huge at 21 months of age within each breed group

**Supplementary Table 5. Predicted absolute growth rate (AGR;  $\pm$ SEM) from 3 to 21 months of age for Jersey crossbred (JX) heifers that were tiny, small, average, big or huge at 21 months of age and were 45%, 55% or 65% of their 21-month live weight (LWT) at 12 months of age (LWT(21/12)%).**

|         | 3-6 mo                        | 6-9 mo                        | 9-12 mo                       | 12-15 mo                      | 15-18 mo                      | 18-21 mo                      |
|---------|-------------------------------|-------------------------------|-------------------------------|-------------------------------|-------------------------------|-------------------------------|
| Tiny    |                               |                               |                               |                               |                               |                               |
| 45%     | 0.42 <sup>a</sup> $\pm$ 0.004 | 0.22 <sup>a</sup> $\pm$ 0.002 | 0.37 <sup>a</sup> $\pm$ 0.003 | 0.65 <sup>c</sup> $\pm$ 0.003 | 0.84 <sup>c</sup> $\pm$ 0.002 | 0.72 <sup>c</sup> $\pm$ 0.004 |
| 55%     | 0.52 <sup>b</sup> $\pm$ 0.003 | 0.37 <sup>b</sup> $\pm$ 0.002 | 0.44 <sup>b</sup> $\pm$ 0.002 | 0.59 <sup>b</sup> $\pm$ 0.002 | 0.67 <sup>b</sup> $\pm$ 0.001 | 0.53 <sup>b</sup> $\pm$ 0.002 |
| 65%     | 0.62 <sup>c</sup> $\pm$ 0.003 | 0.52 <sup>c</sup> $\pm$ 0.002 | 0.52 <sup>c</sup> $\pm$ 0.002 | 0.54 <sup>a</sup> $\pm$ 0.002 | 0.50 <sup>a</sup> $\pm$ 0.001 | 0.34 <sup>a</sup> $\pm$ 0.003 |
| Small   |                               |                               |                               |                               |                               |                               |
| 45%     | 0.46 <sup>a</sup> $\pm$ 0.003 | 0.22 <sup>a</sup> $\pm$ 0.002 | 0.38 <sup>a</sup> $\pm$ 0.003 | 0.69 <sup>c</sup> $\pm$ 0.003 | 0.90 <sup>c</sup> $\pm$ 0.002 | 0.76 <sup>c</sup> $\pm$ 0.003 |
| 55%     | 0.58 <sup>b</sup> $\pm$ 0.002 | 0.39 <sup>b</sup> $\pm$ 0.002 | 0.47 <sup>b</sup> $\pm$ 0.002 | 0.64 <sup>b</sup> $\pm$ 0.002 | 0.73 <sup>b</sup> $\pm$ 0.001 | 0.55 <sup>b</sup> $\pm$ 0.002 |
| 65%     | 0.69 <sup>c</sup> $\pm$ 0.003 | 0.56 <sup>c</sup> $\pm$ 0.002 | 0.56 <sup>c</sup> $\pm$ 0.002 | 0.60 <sup>a</sup> $\pm$ 0.002 | 0.56 <sup>a</sup> $\pm$ 0.001 | 0.33 <sup>a</sup> $\pm$ 0.003 |
| Average |                               |                               |                               |                               |                               |                               |
| 45%     | 0.49 <sup>a</sup> $\pm$ 0.003 | 0.23 <sup>a</sup> $\pm$ 0.002 | 0.41 <sup>a</sup> $\pm$ 0.003 | 0.74 <sup>c</sup> $\pm$ 0.002 | 0.95 <sup>c</sup> $\pm$ 0.001 | 0.76 <sup>c</sup> $\pm$ 0.003 |
| 55%     | 0.61 <sup>b</sup> $\pm$ 0.002 | 0.40 <sup>b</sup> $\pm$ 0.002 | 0.50 <sup>b</sup> $\pm$ 0.002 | 0.68 <sup>b</sup> $\pm$ 0.002 | 0.77 <sup>b</sup> $\pm$ 0.001 | 0.55 <sup>b</sup> $\pm$ 0.002 |
| 65%     | 0.73 <sup>c</sup> $\pm$ 0.003 | 0.58 <sup>c</sup> $\pm$ 0.002 | 0.59 <sup>c</sup> $\pm$ 0.002 | 0.63 <sup>a</sup> $\pm$ 0.002 | 0.58 <sup>a</sup> $\pm$ 0.001 | 0.33 <sup>a</sup> $\pm$ 0.003 |
| Big     |                               |                               |                               |                               |                               |                               |
| 45%     | 0.52 <sup>a</sup> $\pm$ 0.003 | 0.23 <sup>a</sup> $\pm$ 0.002 | 0.43 <sup>a</sup> $\pm$ 0.003 | 0.79 <sup>c</sup> $\pm$ 0.002 | 1.00 <sup>c</sup> $\pm$ 0.001 | 0.76 <sup>c</sup> $\pm$ 0.003 |
| 55%     | 0.64 <sup>b</sup> $\pm$ 0.002 | 0.41 <sup>b</sup> $\pm$ 0.002 | 0.52 <sup>b</sup> $\pm$ 0.002 | 0.73 <sup>b</sup> $\pm$ 0.002 | 0.81 <sup>b</sup> $\pm$ 0.001 | 0.54 <sup>b</sup> $\pm$ 0.002 |
| 65%     | 0.76 <sup>c</sup> $\pm$ 0.003 | 0.60 <sup>c</sup> $\pm$ 0.002 | 0.61 <sup>c</sup> $\pm$ 0.002 | 0.67 <sup>a</sup> $\pm$ 0.002 | 0.62 <sup>a</sup> $\pm$ 0.001 | 0.32 <sup>a</sup> $\pm$ 0.003 |
| Huge    |                               |                               |                               |                               |                               |                               |
| 45%     | 0.57 <sup>a</sup> $\pm$ 0.003 | 0.24 <sup>a</sup> $\pm$ 0.002 | 0.46 <sup>a</sup> $\pm$ 0.003 | 0.86 <sup>c</sup> $\pm$ 0.002 | 1.09 <sup>c</sup> $\pm$ 0.001 | 0.78 <sup>c</sup> $\pm$ 0.003 |
| 55%     | 0.70 <sup>b</sup> $\pm$ 0.002 | 0.43 <sup>b</sup> $\pm$ 0.002 | 0.55 <sup>b</sup> $\pm$ 0.002 | 0.79 <sup>b</sup> $\pm$ 0.002 | 0.88 <sup>b</sup> $\pm$ 0.001 | 0.54 <sup>b</sup> $\pm$ 0.002 |
| 65%     | 0.82 <sup>c</sup> $\pm$ 0.003 | 0.63 <sup>c</sup> $\pm$ 0.002 | 0.65 <sup>c</sup> $\pm$ 0.003 | 0.72 <sup>a</sup> $\pm$ 0.002 | 0.67 <sup>a</sup> $\pm$ 0.001 | 0.31 <sup>a</sup> $\pm$ 0.003 |

<sup>a-c</sup> Values within a column and LWT category with different superscripts differ at the 95% confidence interval.

Heifers were categorised into quintiles as tiny, small, average, big or huge at 21 months of age within each breed group

**Supplementary Table 6. Predicted absolute growth rate (AGR;  $\pm$ SEM) from 3 to 21 months of age for Jersey (J) heifers that were tiny, small, average, big or huge at 21 months of age and were 45%, 55% or 65% of their 21-month live weight (LWT) at 12 months of age (LWT(12/21)%).**

|         | 3-6 mo                        | 6-9 mo                        | 9-12 mo                       | 12-15 mo                      | 15-18 mo                      | 18-21 mo                      |
|---------|-------------------------------|-------------------------------|-------------------------------|-------------------------------|-------------------------------|-------------------------------|
| Tiny    |                               |                               |                               |                               |                               |                               |
| 45%     | 0.38 <sup>a</sup> $\pm$ 0.005 | 0.22 <sup>a</sup> $\pm$ 0.004 | 0.35 <sup>a</sup> $\pm$ 0.004 | 0.60 <sup>c</sup> $\pm$ 0.004 | 0.77 <sup>c</sup> $\pm$ 0.003 | 0.69 <sup>c</sup> $\pm$ 0.005 |
| 55%     | 0.48 <sup>b</sup> $\pm$ 0.003 | 0.36 <sup>b</sup> $\pm$ 0.002 | 0.42 <sup>b</sup> $\pm$ 0.003 | 0.54 <sup>b</sup> $\pm$ 0.002 | 0.61 <sup>b</sup> $\pm$ 0.001 | 0.52 <sup>b</sup> $\pm$ 0.003 |
| 65%     | 0.58 <sup>c</sup> $\pm$ 0.003 | 0.50 <sup>c</sup> $\pm$ 0.002 | 0.48 <sup>c</sup> $\pm$ 0.003 | 0.48 <sup>a</sup> $\pm$ 0.003 | 0.45 <sup>a</sup> $\pm$ 0.002 | 0.35 <sup>a</sup> $\pm$ 0.003 |
| Small   |                               |                               |                               |                               |                               |                               |
| 45%     | 0.43 <sup>a</sup> $\pm$ 0.005 | 0.22 <sup>a</sup> $\pm$ 0.003 | 0.36 <sup>a</sup> $\pm$ 0.004 | 0.63 <sup>c</sup> $\pm$ 0.004 | 0.83 <sup>c</sup> $\pm$ 0.002 | 0.75 <sup>c</sup> $\pm$ 0.005 |
| 55%     | 0.53 <sup>b</sup> $\pm$ 0.003 | 0.38 <sup>b</sup> $\pm$ 0.002 | 0.44 <sup>b</sup> $\pm$ 0.002 | 0.58 <sup>b</sup> $\pm$ 0.002 | 0.66 <sup>b</sup> $\pm$ 0.001 | 0.55 <sup>b</sup> $\pm$ 0.003 |
| 65%     | 0.63 <sup>c</sup> $\pm$ 0.004 | 0.54 <sup>c</sup> $\pm$ 0.002 | 0.53 <sup>c</sup> $\pm$ 0.003 | 0.54 <sup>a</sup> $\pm$ 0.003 | 0.50 <sup>a</sup> $\pm$ 0.002 | 0.35 <sup>a</sup> $\pm$ 0.004 |
| Average |                               |                               |                               |                               |                               |                               |
| 45%     | 0.46 <sup>a</sup> $\pm$ 0.005 | 0.23 <sup>a</sup> $\pm$ 0.003 | 0.38 <sup>a</sup> $\pm$ 0.004 | 0.67 <sup>c</sup> $\pm$ 0.004 | 0.87 <sup>c</sup> $\pm$ 0.002 | 0.76 <sup>c</sup> $\pm$ 0.005 |
| 55%     | 0.57 <sup>b</sup> $\pm$ 0.003 | 0.39 <sup>b</sup> $\pm$ 0.002 | 0.46 <sup>b</sup> $\pm$ 0.002 | 0.62 <sup>b</sup> $\pm$ 0.002 | 0.70 <sup>b</sup> $\pm$ 0.001 | 0.55 <sup>b</sup> $\pm$ 0.003 |
| 65%     | 0.68 <sup>c</sup> $\pm$ 0.004 | 0.55 <sup>c</sup> $\pm$ 0.002 | 0.54 <sup>c</sup> $\pm$ 0.003 | 0.57 <sup>a</sup> $\pm$ 0.003 | 0.53 <sup>a</sup> $\pm$ 0.002 | 0.35 <sup>a</sup> $\pm$ 0.004 |
| Big     |                               |                               |                               |                               |                               |                               |
| 45%     | 0.49 <sup>a</sup> $\pm$ 0.004 | 0.23 <sup>a</sup> $\pm$ 0.003 | 0.39 <sup>a</sup> $\pm$ 0.003 | 0.71 <sup>c</sup> $\pm$ 0.003 | 0.93 <sup>c</sup> $\pm$ 0.002 | 0.77 <sup>c</sup> $\pm$ 0.004 |
| 55%     | 0.60 <sup>b</sup> $\pm$ 0.003 | 0.40 <sup>b</sup> $\pm$ 0.002 | 0.48 <sup>b</sup> $\pm$ 0.002 | 0.66 <sup>b</sup> $\pm$ 0.002 | 0.74 <sup>b</sup> $\pm$ 0.001 | 0.56 <sup>b</sup> $\pm$ 0.003 |
| 65%     | 0.72 <sup>c</sup> $\pm$ 0.004 | 0.58 <sup>c</sup> $\pm$ 0.003 | 0.57 <sup>c</sup> $\pm$ 0.003 | 0.60 <sup>a</sup> $\pm$ 0.003 | 0.56 <sup>a</sup> $\pm$ 0.002 | 0.35 <sup>a</sup> $\pm$ 0.004 |
| Huge    |                               |                               |                               |                               |                               |                               |
| 45%     | 0.53 <sup>a</sup> $\pm$ 0.004 | 0.23 <sup>a</sup> $\pm$ 0.003 | 0.43 <sup>a</sup> $\pm$ 0.003 | 0.80 <sup>c</sup> $\pm$ 0.003 | 1.02 <sup>c</sup> $\pm$ 0.002 | 0.77 <sup>c</sup> $\pm$ 0.004 |
| 55%     | 0.65 <sup>b</sup> $\pm$ 0.003 | 0.42 <sup>b</sup> $\pm$ 0.002 | 0.52 <sup>b</sup> $\pm$ 0.002 | 0.73 <sup>b</sup> $\pm$ 0.002 | 0.81 <sup>b</sup> $\pm$ 0.001 | 0.55 <sup>b</sup> $\pm$ 0.003 |
| 65%     | 0.77 <sup>c</sup> $\pm$ 0.004 | 0.61 <sup>c</sup> $\pm$ 0.003 | 0.61 <sup>c</sup> $\pm$ 0.003 | 0.66 <sup>a</sup> $\pm$ 0.003 | 0.61 <sup>a</sup> $\pm$ 0.002 | 0.34 <sup>a</sup> $\pm$ 0.004 |

<sup>a-c</sup> Values within a column and LWT category with different superscripts differ at the 95% confidence interval.

Heifers were categorised into quintiles as tiny, small, average, big or huge at 21 months of age within each breed group
